# Supplementary material
Source: PubMed Central journal article supplement (PMC5849103)
Supplement: cix558_suupl_supplementary_data.pdf [file cix558_suupl_supplementary_data.pdf]

**Supplementary Table 1:** Data of the days of disease, signs, symptoms, and laboratory findings of each patient collected from January to February 2016, in the city of São José do Rio Preto, São Paulo, Brazil.

| <b>Group / Patient ID</b> | <b>Age/Gender</b> | <b>Comorbidities</b> | <b>Days between onset of the symptoms and medical assessment</b> | <b>Signs and Symptoms</b>                                                        | <b>Laboratory findings</b>          |
|---------------------------|-------------------|----------------------|------------------------------------------------------------------|----------------------------------------------------------------------------------|-------------------------------------|
| <b>DENV-2 / IgG -</b>     |                   |                      |                                                                  |                                                                                  |                                     |
| 2421                      | 28/F              | No                   | 4                                                                | Myalgia, headache, fever                                                         | Ht 35.1; leuko 4,200; Plat 206,000  |
| 2427                      | 17/F              | No                   | 3                                                                | Headache, retrorbital pain, myalgia, exanthema, mucosal bleeding (gingivorrhage) | Ht 13; Leuko 8,440; Plat 255,000    |
| 2430                      | N/A               | N/A                  | N/A                                                              | N/A                                                                              | N/A                                 |
| 2651                      | 25/F              | No                   | 2                                                                | Myalgia, exanthema, headache, retrorbital pain                                   | Ht 13.4; Leuko 3,910; Plat 189,000  |
| 2904                      | 5/M               | No                   | 0                                                                | Fever, headache                                                                  | Ht 14; Leuko 6,030; Plat 283,000    |
| 3523                      | 5/M               | No                   | 3                                                                | Fever, abdominal pain, myalgia.                                                  | Ht 33.4; Leuko 6,760; Plat 137,000  |
| <b>DENV2/IgG+</b>         |                   |                      |                                                                  |                                                                                  |                                     |
| 2056                      | 45/M              | No                   | 1                                                                | Fever, headache, retrorbital pain, myalgia                                       | Ht 12.9; Leuko 2,640; Plat 119,000  |
| 2149                      | 55/F              | No                   | 4                                                                | Fever, headache, gingivorrhage, myalgia                                          | Ht 45.1; Leuko 29,400; Plat 137,000 |
| 2153                      | 21/F              | No                   | 2                                                                | Fever, headache, exanthema, retrorbital pain, myalgia                            | Ht 40.9; Leuko 1,450; Plat 165,000  |
| 2286                      | 31/F              | No                   | 3                                                                | Fever, headache, retrorbital pain, myalgia                                       | Ht 43.6; Leuko 1,920; Plat 188,000  |
| 2287                      | 29/M              | No                   | 0                                                                | Fever                                                                            | Ht 15.2; Leuko 3,770; Plat 135,000  |

|      |      |              |     |                                            |                                     |
|------|------|--------------|-----|--------------------------------------------|-------------------------------------|
| 2422 | 61/F | No           | 5   | Headache, exanthema, myalgia               | Ht 41; Leuko 4,230; PLat 208,000    |
| 2423 | 40/M | No Evolution | N/A | N/A                                        | Ht 39.7; Leuko 10,050; Plat 182,000 |
| 2424 | 52/M | No           | 5   | Fever, headache, retrorbital pain, myalgia | Ht 42; Leuko 5,020; Plat 162,000    |
| 2425 | 63/F | No           | 0   | Fever, myalgia, abdominal pain, dyarrhea   | Ht 11.9; Leuko 3,230; Plat 182,000  |
| 2426 | 34/M | No           | 6   | Fever, headache, retrorbital pain, myalgia | Ht 39.8; Leuko 3,430; Plat 130,000  |
| 2429 | 26/F | N/A          | N/A | N/A                                        | N/A                                 |
| 2529 | 50/F | No           | 1   | Myalgia, arthralgia, exanthema             | Ht 39.9; Leuko 3,790; Plat 142,000, |
| 2530 | 43/M | Hypertension | 2   | Fever, myalgia, exanthema, diarrhea        | Ht 42.3; Leuko 3,290; Plat 106,000  |
| 2654 | 33/F | N/A          |     | N/A                                        | N/A                                 |

---

**ZIKA/IgG-**

---

|        |      |              |     |                                                                                          |                                    |
|--------|------|--------------|-----|------------------------------------------------------------------------------------------|------------------------------------|
| 2659   | 23/F | No           | 3   | Fever, headache, myalgia, gingivorrhage, tourniquet test positive                        | Ht 38.5; Leuko 3,400; Plat 164,000 |
| 3226   | 52/F | No           | 2   | Fever, headache, retrorbital pain, myalgia, tourniquet test positive                     | Ht 36.7; Leuko 3,570; Plat 174,000 |
| 16/253 | 38/M | No Evolution | N/A | N/A                                                                                      | N/A                                |
| 114    | 6/F  | No           | 3   | Exanthema, fever, headache                                                               | Ht 36.0; Leuko 4,070; Plat 307,000 |
| 116    | 16/M | No           | 2   | Fever, myalgia, joint pain, nausea, conjunctival hyperemia, headache, myalgia, exanthema | N/A                                |
| 227    | 39/F | No           | 3   | Fever, nausea, abdominal pain, sore throat, myalgia, exanthema                           | N/A                                |
| 237    | 34/M | No           | 2   | Fever, vomiting, nausea, conjunctival hyperemia, cough, headache, myalgia,               | Ht 47.3; Leuko 2,810; Plat 188,000 |

|                  |      |                            |     |                                                                         |                                     |  |
|------------------|------|----------------------------|-----|-------------------------------------------------------------------------|-------------------------------------|--|
|                  |      |                            |     |                                                                         | exanthema                           |  |
| 244              | 46/M | No                         | 2   | Joint pain, conjunctival hyperemia, myalgia, exanthema                  | Ht 38.1; Leuko 3,990; Plat 174,000  |  |
| 264              | 45/F | No                         | 2   | Fever, joint pain, conjunctival hyperemia, headache, myalgia, exanthema | N/A                                 |  |
| 281              | 24/M | No                         | 2   | Fever, nausea, conjunctival hyperemia, headache, myalgia, exanthema     | N/A                                 |  |
| <b>ZIKA/IgG+</b> |      |                            |     |                                                                         |                                     |  |
| 1848             | 77/F | No                         | 4   | Fever, headache, myalgia, tourniquet test positive                      | Ht 40.1; Leuko 4,520; Plaq 110,000  |  |
| 1855             | 49/M | no                         | 2   | Fever, myalgia, arthralgia                                              | Ht 42.8; Leuko 3,200; Plat 145,000  |  |
| 1856             | 44/F | No                         | 3   | Fever, headache, myalgia, nausea                                        | Ht 33.6; Leuko 12,130; Plat 307,000 |  |
| 1857             | 38/F | N/A                        | N/A | N/A                                                                     | N/A                                 |  |
| 1863             | 39/M | No                         | 1   | Fever, myalgia                                                          | Ht 40.3; Leuko 7,600; Plat 143,000  |  |
| 2655             | 30/F | No                         | 0   | Fever, headache, retrorbital pain, myalgia, tourniquet test positive    | Ht 42.2; Leuko 3720; Plat 171,000   |  |
| 3212             | 39/F | No                         | 1   | Fever, myalgia, pruritus                                                | Ht 38.3; Leuko 6,340; Plat 269,000  |  |
| 3601             | 56/F | N/A                        | N/A | N/A                                                                     | N/A                                 |  |
| 16/18            | 38/F | Hypothyroidism / pregnancy | 0   | Exanthema                                                               | Ht 39.7; Leuko 6,650; Plat 202,000  |  |
| 16/42            | 28/F | No                         | 1   | Exanthema, pruritus, myalgia                                            | Ht 40.4; Leuko 5,150; Plat 283,000  |  |
| 16/43            | 54/F | No                         | 1   | Exanthema, pruritus, conjunctivitis, fever                              | Ht 38.1; Leuko 3,450; Plat 187,000  |  |

|       |      |                                                         |     |                                                                                         |                                    |
|-------|------|---------------------------------------------------------|-----|-----------------------------------------------------------------------------------------|------------------------------------|
| 16/53 | 30/F | Pregnancy                                               | N/A | No complaints                                                                           | No                                 |
| 16/19 | 21/F | Pregnancy                                               | 2   | Exanthema, pruritus                                                                     | No                                 |
| 16/58 | 38/F | No                                                      | 2   | Fever, myalgia, retroorbital pain, conjunctivitis                                       | Ht 40.6; Leuko 3,890; Plat 250,000 |
| 16/61 | 36/F | Pregnancy,<br>Idiopathic<br>thrombocytopenic<br>purpura | 1   | Fever, myalgia                                                                          | ht 40.6; Leuko 12,710; Plat 34,000 |
| 16/67 | 44/F | No                                                      | 1   | Exanthema, pruritus                                                                     | Ht 40.2; Leuko 4,170; Plat 278,000 |
| 16/69 | 17/F | Pregnancy                                               | 1   | Fever, exanthema, pruritus, retroorbital pain,<br>myalgia                               | Ht 35.8; Leuko 6,940; Plat 215,000 |
| 41    | 75/F | No                                                      | 2   | Joint pain, conjunctival hyperemia, myalgia,<br>exanthema                               | Ht 40.8; Leuko 3,580; Plat 163,000 |
| 117   | 65/F | No                                                      | 2   | Fever, joint pain, nausea, headache, myalgia,<br>exanthema                              | N/A                                |
| 144   | 46/F | No                                                      | 1   | Fever, joint pain, conjunctival hyperemia, sore<br>throat, headache, myalgia, exanthema | N/A                                |
| 164   | 15/F | No                                                      | 4   | Fever, joint pain, headache, myalgia, exanthema                                         | N/A                                |
| 190   | 59/F | No                                                      | 3   | Fever, joint pain, diarrhea, nausea, conjunctival<br>hyperemia, myalgia, exanthema      | Ht 39.7; Leuko 3,910; Plat 197,000 |
| 193   | 50/F | No                                                      | 1   | Joint pain, diarrhea, conjunctival hyperemia,<br>exanthema                              | Ht 44.3; Leuko 4,820; Plat 220,000 |
| 218   | 11/F | No                                                      | 3   | Fever, joint pain, nausea, headache, myalgia,<br>exanthema                              | Ht 39.1; Leuko 3,090; Plat 148,000 |

|     |      |    |   |                                                                                     |                                    |
|-----|------|----|---|-------------------------------------------------------------------------------------|------------------------------------|
| 225 | 45/F | No | 1 | Fever, joint pain, exanthema                                                        | N/A                                |
| 228 | 73/F | No | 3 | Fever, joint pain, diarrhea, headache, myalgia, exanthema                           | Ht 38,1; Leuko 5,790; Plat 205,000 |
| 229 | 11/F | No | 3 | Fever, joint pain, nausea, headache, myalgia, exanthema                             | Ht 39,1; Leuko 3,090; Plat 148,000 |
| 231 | 40/F | No | 3 | Fever, vomiting, joint pain, conjunctival hyperemia, headache, exanthema            | Ht 38,3; Leuko 4,730; Plat 257,000 |
| 232 | 26/F | No | 3 | Joint pain, conjunctival hyperemia, exanthema                                       | Ht 40,1; Leuko 2,810; Plat 240,000 |
| 235 | 51/F | No | 2 | Fever, conjunctival hyperemia, headache, exanthema                                  | N/A                                |
| 238 | 48/F | No | 4 | Fever, vomiting, joint pain, headache, myalgia, exanthema                           | N/A                                |
| 239 | 59/F | No | 2 | Joint pain, conjunctival hyperemia, myalgia, exanthema                              | Ht 44,6; Leuko 3,990; Plat 174,000 |
| 255 | 47/F | No | 3 | Nausea, conjunctival hyperemia, sore throat, myalgia, exanthema                     | Ht 39,2; Leuko 4,240; Plat 267,000 |
| 256 | 58/F | No | 4 | Fever, nausea, conjunctival hyperemia, headache, myalgia, exanthema                 | Ht 38,3; Leuko 3,730; Plat 208,000 |
| 293 | 27/M | No | 3 | Fever, joint pain, nausea, conjunctival hyperemia, sore throat, headache, exanthema | N/A                                |

---

N/A: not available

**Supplementary Table 2:** Comparative table of the cytokine levels and viral load of each patient.

| Group              | Cytokines (pg/mL) |       |       |       |      |              |      |        |       |       | Viral Load (GE/mL) | Viral Load (Log <sub>10</sub> ) |
|--------------------|-------------------|-------|-------|-------|------|--------------|------|--------|-------|-------|--------------------|---------------------------------|
|                    | IFN- $\gamma$     | IL-10 | IL-13 | IL-17 | IL-9 | IL-1 $\beta$ | IL-2 | IL-4   | IL-6  | IL-8  |                    |                                 |
| <b>DENV2/ IgG-</b> |                   |       |       |       |      |              |      |        |       |       |                    |                                 |
| 2421               | 40.57             | 0.14  | 0     | 2.07  | 1.51 | 1.55         | 0.64 | 0.02   | 2.42  | 29.26 | 381.955            | 2.58                            |
| 2427               | 14.81             | 3.2   | 508   | 2.65  | 5.79 | 13.3         | 4.09 | 0.18   | 15.6  | 941   | 65,923.391         | 4.82                            |
| 2430               | 46.01             | 18.61 | 591   | 9.17  | 4.48 | 3.39         | 3.92 | 2.95   | 21.64 | 146   | undetermined       |                                 |
| 2651               | 15.2              | 0     | 0     | 1.09  | 0.46 | 1.82         | 0.4  | 0      | 9.72  | 1272  | 5,069.282          | 3.71                            |
| 2904               | 38.1              | 426   | 1.03  | 2.18  | 1.27 | 11.56        | 0.78 | 0.05   | 95.4  | 629   | 56,969.691         | 4.76                            |
| 3523               | 33.18             | 18.61 | 0.39  | 1.18  | 0.99 | 1.61         | 1.03 | 0      | 16.83 | 123   | 19,037.061         | 4.28                            |
| <b>DENV2/IgG+</b>  |                   |       |       |       |      |              |      |        |       |       |                    |                                 |
| 2056               | 40.57             | 0.14  | 0     | 0.64  | 0.16 | 0.62         | 0.47 | 0      | 2.84  | 21.64 | 201,948.176.000    | 8.31                            |
| 2149               | 8.39              | 50.88 | 0     | 0.93  | 0.5  | 2.72         | 0.78 | 0      | 0.83  | 230   | 81,072.836         | 4.91                            |
| 2153               | 236               | 17.69 | 0     | 1.01  | 0.42 | 0.96         | 0.6  | 0      | 3.39  | 30    | 35,212.434         | 4.55                            |
| 2286               | 219               | 100   | 0     | 0.78  | 0.27 | 1.09         | 0.55 | 0      | 1.17  | 41.6  | 9,426.285          | 3.97                            |
| 2287               | 21.64             | 52.17 | 555   | 1.75  | 1.68 | 1.21         | 1.96 | 0.02   | 3.11  | 62.21 | 224,237.824.000    | 8.35                            |
| 2422               | 36.69             | 132   | 0     | 0.93  | 0.38 | 0.73         | 0.47 | 0      | 1.27  | 20.57 | 2,631.594          | 3.42                            |
| 2423               | 52.17             | 43.75 | 0     | 1.36  | 0.5  | 1.41         | 0.6  | 0      | 9.17  | 123   | 3,276.827          | 3.52                            |
| 2424               | 7.26              | 111   | 0     | 0.67  | 0.31 | 0.67         | 0.23 | 0      | 2.12  | 78.01 | 6,367.691          | 3.80                            |
| 2425               | 3.62              | 48.38 | 0     | 1.18  | 0.38 | 0.9          | 0.69 | 0      | 1.32  | 102   | 5,972.523.008.000  | 9.78                            |
| 2426               | 203               | 0.04  | 0     | 1.27  | 0.46 | 1.03         | 0.51 | 0.01   | 9.72  | 45.43 | 325,583.625        | 5.51                            |
| 2429               | * 16.41           | 103   | 261   | 2.29  | 1.85 | 1.97         | 1.83 | 0.08   | 5.48  | 65.42 | 15,269.444         | 4.18                            |
| 2529               | 12.24             | 0.11  | 0.61  | 1.27  | 0.38 | 0.73         | 0.4  | 0      | 0.24  | 242   | 2,852.932          | 3.46                            |
| 2530               | 261               | 894   | 174   | 2.41  | 7.69 | 1.55         | 6.29 | 0.03   | 19.57 | 139   | 5,871.356          | 3.77                            |
| 2654               | 465               | 0     | 0     | 1.18  | 0.38 | 0.96         | 0.51 | * 0.01 | 3.39  | 100   | 14,049.039         | 4.15                            |
| <b>ZIKV/IgG-</b>   |                   |       |       |       |      |              |      |        |       |       |                    |                                 |

|        |       |       |   |      |      |      |      |      |       |       |           |      |
|--------|-------|-------|---|------|------|------|------|------|-------|-------|-----------|------|
| 2659   | 39.07 | 0.02  | 0 | 0.93 | 0.31 | 0.79 | 0.4  | 0    | 0.5   | 10.92 | 385.009   | 2.59 |
| 3226   | 112   | 97.83 | 0 | 1.45 | 2.78 | 2.96 | 2.11 | 0.02 | 13.67 | 188   | 20.518    | 1.31 |
| 16/253 | 4.27  | 0.02  | 0 | 2.18 | 0.55 | 1.28 | 0.83 | 0    | 0.28  | 12.59 | 11.760    | 1.07 |
| 114    | 362   | 100   | 0 | 1.85 | 0.81 | 0.96 | 0.55 | 0    | 4.27  | 5.48  | 21.385    | 1.33 |
| 116    | 39.56 | 0.11  | 0 | 1.45 | 0.36 | 0.84 | 0.62 | 0    | 2.12  | 7.26  | 5,021.485 | 3.70 |
| 227    | 54.86 | 23.93 | 0 | 0.93 | 0.31 | 0.84 | 0.36 | 0    | 0.83  | 34.02 | 75.983    | 1.88 |
| 237    | 19.57 | 0.08  | 0 | 1.45 | 0.5  | 1.09 | 0.55 | 0    | 1.85  | 111   | 337.100   | 2.53 |
| 244    | 166   | 39.56 | 0 | 1.18 | 0.42 | 0.96 | 0.51 | 0.01 | 2.92  | 18.14 | 10.736    | 1.03 |
| 264    | 18.14 | 0.42  | 0 | 0.93 | 0.31 | 0.67 | 0.33 | 0    | 0.18  | 14.05 | 4,667.002 | 3.67 |
| 281    | 46.01 | 46.01 | 0 | 1.65 | 0.55 | 1.03 | 0.6  | 0    | 2.92  | 26.46 | 11.464    | 1.06 |

---

ZIKV/IgG+

|       |       |       |      |       |       |      |      |       |       |       |            |      |
|-------|-------|-------|------|-------|-------|------|------|-------|-------|-------|------------|------|
| 1848  | 16.83 | 16.83 | 0    | 1.09  | 6.29  | 0.9  | 0.43 | 0.01  | 1.72  | 16.41 | 27.483     | 1.44 |
| 1855  | 95.4  | 84.13 | 1809 | 10.01 | 14.81 | 5.34 | 8.39 | 16.83 | 15.2  | 219   | 41.416     | 1.62 |
| 1856  | 126   | 0.42  | 0    | 26.46 | 0.87  | 2.72 | 0.55 | 0.01  | 27.82 | 158   | 12.991     | 1.11 |
| 1857  | 88.47 | 53.5  | 0    | 1.36  | 0.38  | 1.75 | 0.6  | 0     | 23.33 | 95.4  | 233.536    | 2.37 |
| 1863  | 527   | 105   | 0    | 3.92  | 0.75  | 4.59 | 1.2  | 0.01  | 1108  | 288   | 21.639     | 1.34 |
| 2655  | 63.8  | 23.93 | 0    | 0.85  | 0.34  | 0.67 | 0.33 | 0     | 0.5   | 16.83 | 337.058    | 2.53 |
| 3212  | 37.62 | 26.46 | 0    | 1.01  | 0.7   | 1.21 | 0.6  | 0     | 0.9   | 25.48 | 39.216     | 1.59 |
| 3601  | 120   | 103   | 0.01 | 1.55  | 1.59  | 4.48 | 0.51 | 0.01  | 13.67 | 52.17 | 96.267     | 1.98 |
| 16/18 | 22.75 | 17.69 | 0    | 1.96  | 0.7   | 1.34 | 0.6  | 0.02  | 0.75  | 8.15  | 1,203.898  | 3.08 |
| 16/42 | 1831  | 10.3  | 0    | 6.47  | 1.35  | 2.26 | 0.93 | 0.02  | 0.56  | 6.47  | 245.707    | 2.39 |
| 16/43 | 34.89 | 56.26 | 0    | 1.36  | 0.38  | 0.9  | 0.43 | 0     | 1.08  | 18.14 | 765.413    | 2.88 |
| 16/53 | 39.56 | 53.5  | 0    | 1.27  | 0.34  | 0.79 | 0.29 | 0     | 38.58 | 46.01 | 827.721    | 2.92 |
| 16/19 | 38.58 | 183   | 0    | 1.36  | 0.46  | 1.28 | 0.6  | 0     | 1.27  | 27.13 | 1,954.334  | 3.29 |
| 16/58 | 144   | 76.08 | 0    | 2.65  | 1.13  | 1.09 | 1.03 | 0.01  | 4.09  | 18.61 | 785.352    | 2.90 |
| 16/61 | 83.08 | 213   | 0.51 | 1.09  | 0.65  | 1.28 | 0.73 | 0     | 6.12  | 28.53 | 20,187.725 | 4.31 |
| 16/67 | 43.75 | 15.2  | 0    | 1.96  | 0.46  | 0.67 | 0.29 | 0     | 0.5   | 6.85  | 803.041    | 2.90 |
| 16/69 | 23.33 | 12.94 | 0    | 1.85  | 0.5   | 1.48 | 0.78 | 0.01  | 1.27  | 17.69 | 935.548    | 2.97 |
| 41    | 38.58 | 93.03 | 0    | 1.18  | 0.32  | 0.67 | 0.36 | 0     | 19.57 | 146   | 197.092    | 2.30 |

|     |       |       |       |      |      |      |      |      |       |       |              |      |
|-----|-------|-------|-------|------|------|------|------|------|-------|-------|--------------|------|
| 117 | 34.45 | 12.94 | 0     | 1.18 | 0.38 | 0.96 | 0.43 | 0    | 1.37  | 88.47 | 14.181       | 1.15 |
| 144 | 111   | 100   | 0     | 4.94 | 0.87 | 2.19 | 1.38 | 0.03 | 37.62 | 17.69 | 27.236       | 1.44 |
| 164 | 17.25 | 6.47  | 0     | 2.07 | 0.55 | 1.68 | 0.93 | 0.83 | 1.08  | 32.35 | 67.069       | 1.83 |
| 190 | 50.24 | 63.8  | 37.62 | 3.03 | 0.59 | 1.21 | 1.32 | 0.02 | 1.27  | 362   | 20,532.117   | 4.31 |
| 193 | 29.26 | 41.6  | 0     | 2.07 | 0.55 | 1.34 | 0.64 | 0    | 17.69 | 30    | 310.290      | 2.49 |
| 218 | 14.43 | 15.2  | 0     | 0.93 | 0.87 | 0.84 | 0.64 | 0.01 | 0.36  | 3.62  | 575.328      | 2.76 |
| 225 | 52.17 | 1.89  | 54.86 | 1.5  | 0.55 | 1.03 | 0.58 | 0    | 0.68  | 248   | undetermined |      |
| 228 | 37.15 | 19.57 | 0     | 1.36 | 0.7  | 1.03 | 0.51 | 0.14 | 21.64 | 26.46 | 149.894      | 2.18 |
| 229 | 10.3  | 2.6   | 0     | 1.09 | 1.06 | 1.21 | 0.83 | 0.01 | 0.45  | 49.61 | 20.365       | 1.31 |
| 231 | 21.1  | 41.6  | 713   | 2.18 | 2.04 | 4.59 | 4.48 | 0.11 | 13.67 | 7489  | 8.392        | 0.92 |
| 232 | 27.13 | 0.25  | 0     | 1.55 | 0.57 | 1.75 | 0.64 | 0.01 | 0.9   | 174   | 27.053       | 1.43 |
| 235 | 15.2  | 30.77 | 0     | 0.78 | 0.21 | 0.62 | 0.29 | 0    | 3.39  | 6.47  | 1,474.916    | 3.17 |
| 238 | 30    | 41.6  | 213   | 1.75 | 63.8 | 1.68 | 1.38 | 0.23 | 2.58  | 25.8  | 10,888.601   | 4.04 |
| 239 | 35.78 | 23.93 | 0     | 1.75 | 0.65 | 1.09 | 0.6  | 0    | 27.13 | 7.26  | 10.192       | 1.01 |
| 255 | 129   | 95.4  | 0     | 1.45 | 0.55 | 1.82 | 1.79 | 0.01 | 6.85  | 19.57 | 447.297      | 2.65 |
| 256 | 19.57 | 30.77 | 0     | 1.18 | 0.38 | 0.73 | 0.4  | 0    | 1.37  | 22.19 | 7,904.634    | 3.90 |
| 293 | 4.7   | 37.62 | 0     | 2.53 | 0.99 | 1.48 | 0.69 | 0.02 | 6.47  | 46.01 | 60.045       | 1.78 |

---

\*This data was excluded from the cytokine analysis due to the low levels of beads required for the reading.



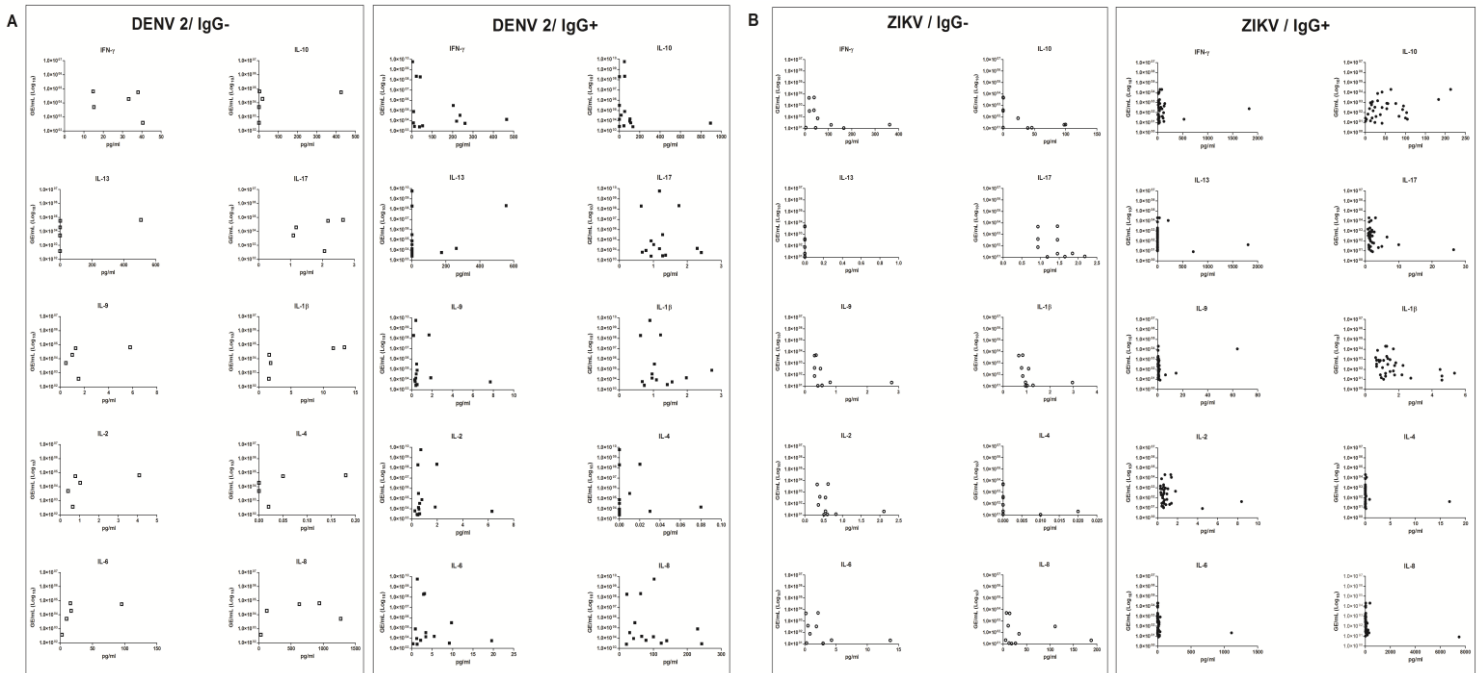

**Supplementary Figure 1:** Cytokines versus viral load profiles in DENV 2 and ZIKV patients during primary and secondary dengue infections. **(a)** Cytokines and viral load levels measured in DENV 2-positive patients with primary (IgG-) DENV infection (n=06) and secondary (IgG+) DENV infection (n=14). The Mann Whitney U test demonstrated no significant *p* value. **(b)** Cytokines and viral load levels measured in ZIKV-positive patients with primary (IgG-) DENV infection (n=10) and secondary (IgG+) DENV infection (n=35). The Mann Whitney U test demonstrated no significant *p* value.
